# Supplementary material
Source: MDPI journal article supplement (https://www.mdpi.com/2073-4441/15/12/2291)
Supplement: s1 [file s1]

**Table S1.** Supplementary information of two wetland systems.

| Unit | Month          | Depth (m) | Flow velocity (m/s) |        | Flow (m <sup>3</sup> /day) |         | HRT(day) | HLR (m <sup>3</sup> *m <sup>2</sup> /day) |        | PLR (g/m <sup>2</sup> /d) | T (°C) |        |
|------|----------------|-----------|---------------------|--------|----------------------------|---------|----------|-------------------------------------------|--------|---------------------------|--------|--------|
|      |                |           | Inlet               | Outlet | Inflow                     | Outflow |          | in                                        | out    |                           | Inlet  | Outlet |
| CW1  | January        | 0.28      | 0.017               | 0.018  | 138.36                     | 139.19  | 43       | 0.0066                                    | 0.0066 | 0.16                      | 8.90   | 7.41   |
|      | February       | 0.29      | 0.018               | 0.016  | 146.50                     | 123.72  | 42       | 0.0070                                    | 0.0059 | 0.22                      | 18.18  | 14.00  |
|      | March          | 0.37      | 0.018               | 0.015  | 146.50                     | 115.99  | 53       | 0.0070                                    | 0.0055 | 0.19                      | 13.52  | 13.04  |
|      | April          | 0.26      | 0.014               | 0.022  | 113.94                     | 170.12  | 48       | 0.0054                                    | 0.0081 | 0.12                      | 19.75  | 18.81  |
|      | May            | 0.31      | 0.017               | 0.015  | 138.36                     | 115.99  | 47       | 0.0066                                    | 0.0055 | 0.13                      | 27.87  | 28.12  |
|      | June           | 0.43      | 0.027               | 0.032  | 219.75                     | 247.45  | 41       | 0.0104                                    | 0.0118 | 0.33                      | 35.80  | 31.41  |
|      | July           | 0.32      | 0.025               | 0.024  | 203.47                     | 185.59  | 33       | 0.0097                                    | 0.0088 | 0.19                      | 29.16  | 29.45  |
|      | August         | 0.29      | 0.016               | 0.014  | 130.22                     | 108.26  | 47       | 0.0062                                    | 0.0051 | 0.26                      | 30.92  | 28.79  |
|      | September      | 0.31      | 0.025               | 0.026  | 203.47                     | 201.05  | 32       | 0.0097                                    | 0.0096 | 0.31                      | 26.65  | 25.98  |
|      | October        | 0.31      | 0.018               | 0.019  | 146.50                     | 146.92  | 45       | 0.0070                                    | 0.0070 | 0.19                      | 22.88  | 21.22  |
|      | November       | 0.26      | 0.018               | 0.017  | 146.50                     | 131.46  | 37       | 0.0070                                    | 0.0063 | 0.14                      | 24.02  | 20.59  |
|      | December       | 0.21      | 0.016               | 0.016  | 130.22                     | 123.72  | 34       | 0.0062                                    | 0.0059 | 0.27                      | 11.93  | 10.63  |
|      | <b>average</b> | 0.30      | 0.019               | 0.020  | 155.32                     | 150.79  | 42       | 0.0074                                    | 0.0072 | 0.21                      | 22.47  | 20.79  |
| CW2  | January        | 0.27      | 0.015               | 0.021  | 122.08                     | 162.39  | 47       | 0.0057                                    | 0.0076 | 0.19                      | 9.35   | 8.60   |
|      | February       | 0.30      | 0.018               | 0.020  | 146.50                     | 154.66  | 44       | 0.0068                                    | 0.0072 | 0.16                      | 18.48  | 17.27  |
|      | March          | 0.35      | 0.018               | 0.022  | 146.50                     | 170.12  | 51       | 0.0068                                    | 0.0079 | 0.16                      | 13.39  | 12.47  |
|      | April          | 0.28      | 0.037               | 0.014  | 301.14                     | 108.26  | 20       | 0.0141                                    | 0.0051 | 0.40                      | 18.70  | 18.40  |
|      | May            | 0.30      | 0.034               | 0.029  | 276.72                     | 224.25  | 23       | 0.0129                                    | 0.0105 | 0.40                      | 27.77  | 28.12  |
|      | June           | 0.41      | 0.020               | 0.016  | 162.78                     | 123.72  | 54       | 0.0076                                    | 0.0058 | 0.22                      | 33.06  | 34.60  |
|      | July           | 0.29      | 0.038               | 0.016  | 309.28                     | 123.72  | 20       | 0.0145                                    | 0.0058 | 0.38                      | 28.33  | 28.24  |
|      | August         | 0.29      | 0.032               | 0.022  | 260.44                     | 170.12  | 24       | 0.0122                                    | 0.0079 | 0.31                      | 31.49  | 29.63  |
|      | September      | 0.30      | 0.024               | 0.028  | 195.33                     | 216.52  | 33       | 0.0091                                    | 0.0101 | 0.26                      | 25.14  | 24.59  |

|                |      |       |       |        |        |    |        |        |      |       |       |
|----------------|------|-------|-------|--------|--------|----|--------|--------|------|-------|-------|
| October        | 0.33 | 0.016 | 0.012 | 130.22 | 92.79  | 54 | 0.0061 | 0.0043 | 0.15 | 23.80 | 22.43 |
| November       | 0.26 | 0.015 | 0.014 | 122.08 | 108.26 | 46 | 0.0057 | 0.0051 | 0.16 | 23.63 | 22.52 |
| December       | 0.22 | 0.026 | 0.024 | 211.61 | 185.59 | 22 | 0.0099 | 0.0087 | 0.26 | 9.67  | 9.45  |
| <b>average</b> | 0.30 | 0.024 | 0.020 | 198.72 | 153.37 | 37 | 0.0093 | 0.0072 | 0.25 | 21.90 | 21.36 |

Note: CW1: constructed wetland system with *Zizania latifolia* as the dominant species; CW2: constructed wetland system with *Phragmites communis* as the dominant species. HRT: annual average hydraulic retention time (day); HLR: annual average hydraulic loading rate based on surface area ( $\text{m}^3/\text{m}^2/\text{d}$ ); PLR: annual average COD loading rate based on surface area ( $\text{g}/\text{m}^2/\text{d}$ ); T: temperature.

**Table S2.** Monthly water quality index of two wetland systems.

| COD(mg/L) |        |           |       |        |       |
|-----------|--------|-----------|-------|--------|-------|
| Unit      | Season | Month     | Inlet | Outlet | R (%) |
| CW1       | spring | March     | 27.17 | 15.50  | 42.95 |
|           |        | April     | 22.35 | 14.45  | 35.33 |
|           |        | May       | 19.29 | 10.74  | 44.32 |
|           | summer | June      | 31.25 | 18.98  | 39.26 |
|           |        | July      | 19.69 | 9.48   | 51.85 |
|           |        | August    | 41.65 | 17.10  | 58.95 |
|           | autumn | September | 32.09 | 19.80  | 38.30 |
|           |        | October   | 26.87 | 16.51  | 38.57 |
|           |        | November  | 20.18 | 15.65  | 22.45 |
|           | winter | December  | 44.22 | 39.88  | 9.83  |
|           |        | January   | 24.58 | 19.26  | 21.64 |
|           |        | February  | 31.94 | 23.17  | 27.46 |
| CW2       | spring | March     | 22.80 | 17.54  | 23.07 |
|           |        | April     | 28.54 | 19.11  | 33.04 |
|           |        | May       | 30.56 | 18.98  | 37.89 |
|           | summer | June      | 29.01 | 16.30  | 43.81 |
|           |        | July      | 26.19 | 15.55  | 40.63 |
|           |        | August    | 25.23 | 15.48  | 38.64 |
|           | autumn | September | 28.60 | 19.48  | 31.89 |
|           |        | October   | 24.80 | 19.81  | 20.12 |
|           |        | November  | 27.63 | 19.88  | 28.05 |
|           | winter | December  | 26.27 | 21.59  | 17.81 |
|           |        | January   | 32.53 | 28.23  | 13.22 |
|           |        | February  | 23.59 | 22.76  | 3.52  |
| TN (mg/L) |        |           |       |        |       |
| CW1       | spring | March     | 1.44  | 0.94   | 34.72 |
|           |        | April     | 1.35  | 0.82   | 39.26 |
|           |        | May       | 1.11  | 0.67   | 39.64 |
|           | summer | June      | 1.21  | 0.57   | 52.89 |
|           |        | July      | 1.22  | 0.63   | 47.90 |
|           |        | August    | 1.05  | 0.65   | 38.10 |
|           | autumn | September | 1.74  | 0.98   | 43.68 |
|           |        | October   | 1.36  | 0.95   | 29.91 |
|           |        | November  | 1.75  | 0.98   | 43.97 |
|           | winter | December  | 1.07  | 0.93   | 13.08 |
|           |        | January   | 1.46  | 1.19   | 18.49 |
|           |        | February  | 2.32  | 1.83   | 21.12 |
| CW2       | spring | March     | 1.34  | 0.90   | 32.84 |
|           |        | April     | 1.31  | 0.88   | 32.82 |
|           |        | May       | 1.49  | 0.91   | 38.93 |
|           | summer | June      | 1.23  | 0.67   | 45.53 |

|                                        |        |           |      |      |       |
|----------------------------------------|--------|-----------|------|------|-------|
|                                        | autumn | July      | 1.13 | 0.71 | 37.17 |
|                                        |        | August    | 1.15 | 0.66 | 42.61 |
|                                        |        | September | 1.23 | 0.88 | 28.46 |
|                                        |        | October   | 1.23 | 0.90 | 26.83 |
|                                        | winter | November  | 1.35 | 0.92 | 31.85 |
|                                        |        | December  | 1.30 | 1.18 | 9.23  |
|                                        |        | January   | 1.46 | 1.28 | 12.33 |
|                                        |        | February  | 1.34 | 1.21 | 9.70  |
| TP (mg/L)                              |        |           |      |      |       |
| CW1                                    | spring | March     | 0.25 | 0.17 | 32.00 |
|                                        |        | April     | 0.21 | 0.15 | 28.57 |
|                                        |        | May       | 0.20 | 0.13 | 35.00 |
|                                        | summer | June      | 0.23 | 0.12 | 49.18 |
|                                        |        | July      | 0.22 | 0.14 | 36.36 |
|                                        |        | August    | 0.35 | 0.17 | 52.76 |
|                                        | autumn | September | 0.26 | 0.16 | 38.46 |
|                                        |        | October   | 0.20 | 0.12 | 39.92 |
|                                        |        | November  | 0.26 | 0.18 | 31.48 |
|                                        | winter | December  | 0.23 | 0.19 | 17.39 |
|                                        |        | January   | 0.24 | 0.21 | 12.50 |
|                                        |        | February  | 0.21 | 0.20 | 4.76  |
| CW2                                    | spring | March     | 0.22 | 0.18 | 18.18 |
|                                        |        | April     | 0.27 | 0.19 | 29.63 |
|                                        |        | May       | 0.23 | 0.17 | 26.09 |
|                                        | summer | June      | 0.27 | 0.18 | 33.33 |
|                                        |        | July      | 0.30 | 0.19 | 36.67 |
|                                        |        | August    | 0.22 | 0.16 | 27.27 |
|                                        | autumn | September | 0.23 | 0.17 | 26.09 |
|                                        |        | October   | 0.25 | 0.18 | 28.00 |
|                                        |        | November  | 0.24 | 0.17 | 29.17 |
|                                        | winter | December  | 0.21 | 0.20 | 4.76  |
|                                        |        | January   | 0.23 | 0.22 | 4.35  |
|                                        |        | February  | 0.24 | 0.21 | 12.50 |
| NH <sub>4</sub> <sup>+</sup> -N (mg/L) |        |           |      |      |       |
| CW1                                    | spring | March     | 0.50 | 0.29 | 42.00 |
|                                        |        | April     | 0.45 | 0.31 | 31.11 |
|                                        |        | May       | 0.56 | 0.37 | 33.93 |
|                                        | summer | June      | 0.57 | 0.30 | 47.37 |
|                                        |        | July      | 0.39 | 0.20 | 48.72 |
|                                        |        | August    | 0.44 | 0.21 | 52.27 |
|                                        | autumn | September | 0.58 | 0.35 | 39.66 |
|                                        |        | October   | 0.53 | 0.29 | 45.28 |
|                                        |        | November  | 0.55 | 0.27 | 50.91 |
|                                        | winter | December  | 0.44 | 0.42 | 4.55  |

|     |        |           |      |      |       |
|-----|--------|-----------|------|------|-------|
|     |        | January   | 0.72 | 0.70 | 2.78  |
|     |        | February  | 0.38 | 0.35 | 7.89  |
| CW2 | spring | March     | 0.45 | 0.28 | 37.78 |
|     |        | April     | 0.33 | 0.20 | 39.39 |
|     |        | May       | 0.43 | 0.28 | 34.88 |
|     | summer | June      | 0.44 | 0.34 | 22.73 |
|     |        | July      | 0.47 | 0.30 | 36.17 |
|     |        | August    | 0.30 | 0.24 | 20.00 |
|     | autumn | September | 0.41 | 0.36 | 12.20 |
|     |        | October   | 0.45 | 0.38 | 15.56 |
|     |        | November  | 0.54 | 0.40 | 25.93 |
|     | winter | December  | 0.45 | 0.42 | 6.67  |
|     |        | January   | 0.51 | 0.52 | -1.96 |
|     |        | February  | 0.62 | 0.58 | 6.45  |
| pH  |        |           |      |      |       |
| CW1 | spring | March     | 8.02 | 7.77 | -     |
|     |        | April     | 7.89 | 7.58 | -     |
|     |        | May       | 7.85 | 7.63 | -     |
|     | summer | June      | 7.74 | 7.54 | -     |
|     |        | July      | 7.88 | 7.50 | -     |
|     |        | August    | 7.65 | 7.36 | -     |
|     | autumn | September | 7.92 | 7.54 | -     |
|     |        | October   | 7.98 | 7.38 | -     |
|     |        | November  | 8.12 | 7.45 | -     |
|     | winter | December  | 8.25 | 8.06 | -     |
|     |        | January   | 8.45 | 8.00 | -     |
|     |        | February  | 8.30 | 8.18 | -     |
| CW2 | spring | March     | 8.04 | 7.65 | -     |
|     |        | April     | 8.01 | 7.45 | -     |
|     |        | May       | 7.77 | 7.52 | -     |
|     | summer | June      | 7.89 | 7.56 | -     |
|     |        | July      | 7.92 | 7.44 | -     |
|     |        | August    | 7.28 | 7.26 | -     |
|     | autumn | September | 7.85 | 7.77 | -     |
|     |        | October   | 7.65 | 7.68 | -     |
|     |        | November  | 8.02 | 7.90 | -     |
|     | winter | December  | 8.34 | 8.08 | -     |
|     |        | January   | 8.48 | 8.03 | -     |
|     |        | February  | 8.56 | 8.06 | -     |

Note: Treatment units CW1 and CW2 refer to the constructed wetlands defined in Table S1. COD: chemical oxygen demand; TN: total nitrogen; TP: total phosphorus;  $\text{NH}_4^+\text{-N}$ : ammonia nitrogen; R: removal rates.

**Table S3.** Plant richness, diversity and evenness indexes for each season.

| Index                         | Season | Unit |      |
|-------------------------------|--------|------|------|
|                               |        | CW1  | CW2  |
| Margalef (richness)           | Spring | 5.06 | 5.37 |
|                               | Summer | 5.47 | 5.54 |
|                               | Autumn | 4.65 | 4.14 |
|                               | Winter | 2.78 | 3.19 |
| Simpson (diversity)           | Spring | 0.80 | 0.82 |
|                               | Summer | 0.89 | 0.81 |
|                               | Autumn | 0.76 | 0.75 |
|                               | Winter | 0.62 | 0.66 |
| Shannon-Wiener<br>(diversity) | Spring | 2.54 | 2.80 |
|                               | Summer | 2.85 | 2.24 |
|                               | Autumn | 1.74 | 1.58 |
|                               | Winter | 1.24 | 1.17 |
| Pielou (evenness)             | Spring | 0.80 | 0.77 |
|                               | Summer | 0.86 | 0.80 |
|                               | Autumn | 0.67 | 0.53 |
|                               | Winter | 0.38 | 0.40 |

Note: Treatment units CW1 and CW2 refer to the constructed wetlands defined in Table S1.

**Table S4.** Pollutant concentration of the water samples collected at the sites where the sediment samples were taken.

| Unit               | Sample site | COD (mg/L) | TN (mg/L) | TP (mg/L) | NH <sub>4</sub> <sup>+</sup> -N(mg/L) |
|--------------------|-------------|------------|-----------|-----------|---------------------------------------|
| CW1 <sub>in</sub>  | 1           | 39.03      | 1.59      | 0.18      | 0.28                                  |
|                    | 2           | 42.15      | 1.49      | 0.20      | 0.31                                  |
|                    | 3           | 34.28      | 1.82      | 0.21      | 0.30                                  |
|                    | 4           | 31.35      | 1.52      | 0.19      | 0.29                                  |
|                    | 5           | 32.96      | 1.70      | 0.21      | 0.32                                  |
|                    | 6           | 32.47      | 1.86      | 0.19      | 0.33                                  |
| CW1 <sub>out</sub> | 1           | 23.78      | 0.76      | 0.14      | 0.19                                  |
|                    | 2           | 29.03      | 0.66      | 0.13      | 0.18                                  |
|                    | 3           | 29.68      | 0.58      | 0.14      | 0.20                                  |
|                    | 4           | 23.29      | 0.66      | 0.14      | 0.18                                  |
|                    | 5           | 20.50      | 0.70      | 0.17      | 0.22                                  |
|                    | 6           | 21.98      | 0.56      | 0.16      | 0.16                                  |
| CW2 <sub>in</sub>  | 1           | 47.23      | 1.29      | 0.29      | 0.42                                  |
|                    | 2           | 37.06      | 1.49      | 0.30      | 0.40                                  |
|                    | 3           | 35.26      | 1.13      | 0.26      | 0.40                                  |
|                    | 4           | 43.62      | 1.10      | 0.24      | 0.45                                  |
|                    | 5           | 47.89      | 1.20      | 0.24      | 0.38                                  |
|                    | 6           | 45.59      | 1.26      | 0.21      | 0.38                                  |
| CW2 <sub>out</sub> | 1           | 16.24      | 0.95      | 0.19      | 0.33                                  |
|                    | 2           | 18.37      | 0.86      | 0.13      | 0.18                                  |
|                    | 3           | 19.02      | 0.93      | 0.20      | 0.26                                  |
|                    | 4           | 22.14      | 0.78      | 0.23      | 0.30                                  |
|                    | 5           | 20.17      | 0.72      | 0.21      | 0.20                                  |
|                    | 6           | 25.91      | 0.86      | 0.22      | 0.24                                  |

Note: Treatment units CW1 and CW2 refer to the constructed wetlands defined in Table S1. COD, TN, TP and NH<sub>4</sub><sup>+</sup>-N refer to the constructed wetlands defined in Table S1.
